# Supplementary material for: Activating [4 + 4] photoreactivity in the solid-state via complexation: from 9-(methylaminomethyl)anthracene to its silver(i) complexes
Source: Royal Society of Chemistry journal article supplement (doi:10.1039/c8dt00198g), 2018-01-01
Supplement: c8dt00198g1.pdf [file c8dt00198g1.pdf]

# Activating [4+4] photoreactivity in the solid-state via complexation: from 9-(methylaminomethyl)anthracene to its silver(I) complexes.

Floriana Spinelli, Simone d' Agostino, Paola Taddei, Christopher D. Jones, Jonathan W. Steed and Fabrizia Grepioni

## Electronic Supplementary Information

(16 pages)

### *Contents*

|                                     |   |
|-------------------------------------|---|
| Photoreactivity of MAMA in solution | 2 |
| XRPD patterns                       | 2 |
| Crystal structure details           | 3 |
| Gel Phase Crystallization           | 4 |
| <sup>1</sup> H NMR spectroscopy     | 5 |
| Synthesis of the gelator G1         | 6 |
| Raman spectroscopy                  | 7 |

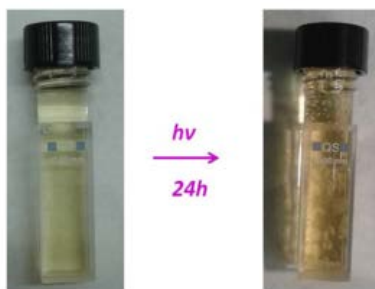

**Fig. S1** Crystallization of the trans photodimer, DMAMA, after irradiation at  $\lambda = 365$  nm of a saturated ethanolic solution.

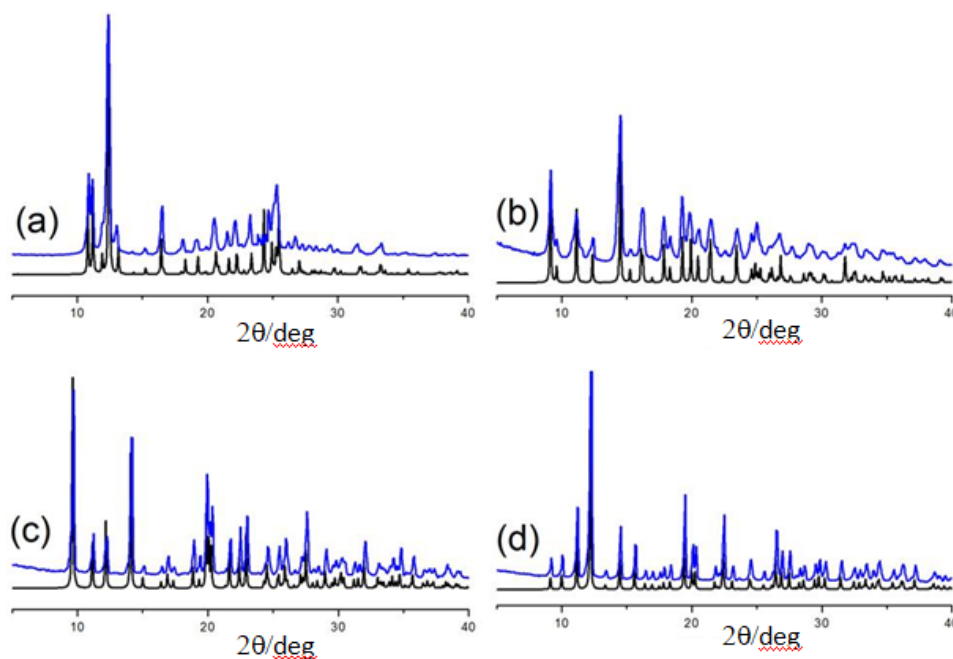

**Fig. S2** Experimental (blue line) and simulated (black line) X-ray powder diffraction patterns for (a) DMAMA and for the complexes (b)  $[\text{Ag}(\text{MAMA})_2][\text{PF}_6]$ , (c)  $[\text{Ag}(\text{MAMA})_2][\text{BF}_4]$  and (d)  $[\text{Ag}(\text{MAMA})_2][\text{Ag}(\text{NO}_3)_2]$ .

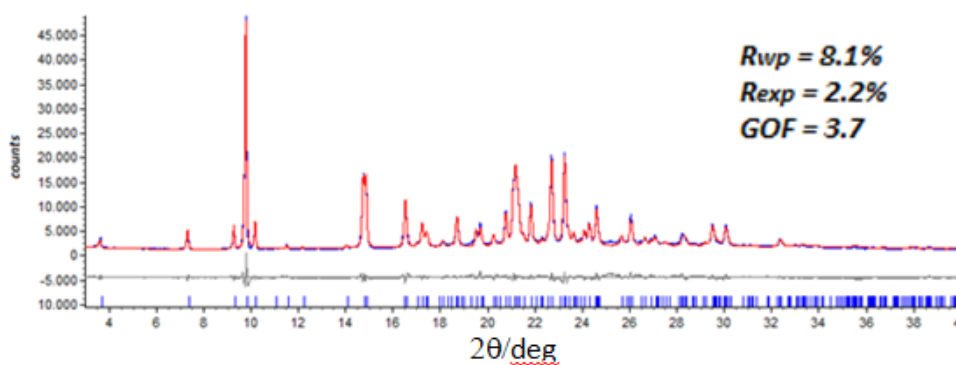

**Fig. S3** Experimental (blue), calculated (red) and difference (grey) patterns for the free ligand MAMA.

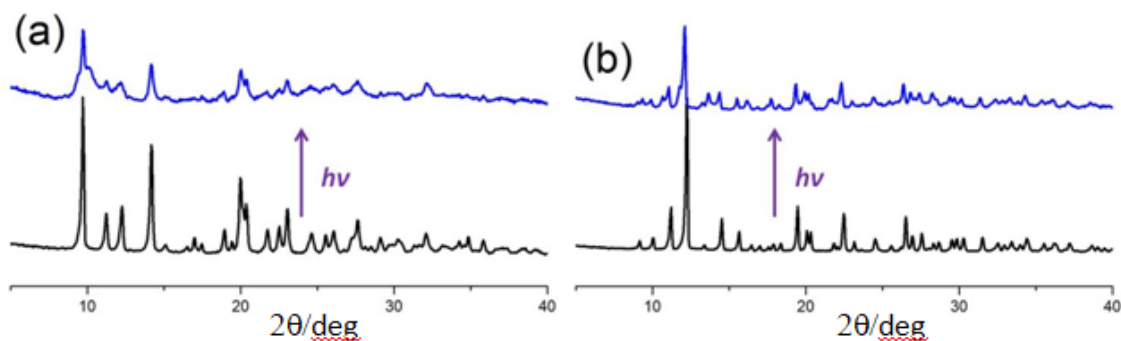

**Fig. S4** Comparison between experimental X-ray powder diffraction patterns run before (black line) and after (blue line) UV irradiation for the complexes: (a)  $[\text{Ag}(\text{MAMA})_2][\text{BF}_4]$  and (b)  $[\text{Ag}(\text{MAMA})_2][\text{Ag}(\text{NO}_3)_2]$ .

**Table S1** Crystal data and details of measurements for crystalline MAMA, DMAMA,  $[\text{Ag}(\text{MAMA})_2][\text{PF}_6]$ ,  $[\text{Ag}(\text{MAMA})_2][\text{BF}_4]$ ,  $[\text{Ag}(\text{MAMA})_2][\text{Ag}(\text{NO}_3)_2]$ , and  $[\text{DMAMAH}_2]\text{Br}_2$ .

|                                            | MAMA                                 | DMAMA                                | $[\text{Ag}(\text{MAMA})_2][\text{PF}_6]$         | $[\text{Ag}(\text{MAMA})_2][\text{BF}_4]$         | $[\text{Ag}(\text{MAMA})_2][\text{Ag}(\text{NO}_3)_2]$ | $[\text{DMAMAH}_2]\text{Br}_2$                    |
|--------------------------------------------|--------------------------------------|--------------------------------------|---------------------------------------------------|---------------------------------------------------|--------------------------------------------------------|---------------------------------------------------|
| <b>Formula</b>                             | $\text{C}_{15}\text{H}_{16}\text{N}$ | $\text{C}_{16}\text{H}_{15}\text{N}$ | $\text{C}_{32}\text{H}_{30}\text{AgF}_6\text{NP}$ | $\text{C}_{32}\text{H}_{30}\text{AgBF}_4\text{N}$ | $\text{C}_{16}\text{H}_{15}\text{AgN}_2\text{O}_3$     | $\text{C}_{32}\text{H}_{32}\text{Br}_2\text{N}_2$ |
| <b>Fw (g/mol)</b>                          | 221.30                               | 221.29                               | 695.42                                            | 637.28                                            | 391.17                                                 | 604.42                                            |
| <b>Cryst. System</b>                       | Triclinic                            | Triclinic                            | Monoclinic                                        | Monoclinic                                        | Monoclinic                                             | Monoclinic                                        |
| <b>Space group</b>                         | P-1                                  | P-1                                  | C2/c                                              | C2/c                                              | C2/c                                                   | P2 <sub>1</sub> /n                                |
| <b>Z</b>                                   | 2                                    | 2                                    | 8                                                 | 8                                                 | 8                                                      | 4                                                 |
| <b>Z'</b>                                  | 2                                    | 2 x 0.5                              | 0.5                                               | 0.5                                               | 0.5                                                    | 0.5                                               |
| <b>a (Å)</b>                               | 24.1250(1)                           | 8.1706(5)                            | 19.4884(9)                                        | 18.6597(9)                                        | 20.4242(12)                                            | 9.202(5)                                          |
| <b>b (Å)</b>                               | 9.65362(3)                           | 9.2479(6)                            | 10.4542(4)                                        | 10.2048(4)                                        | 8.1480(4)                                              | 7.953(5)                                          |
| <b>c (Å)</b>                               | 5.48188(2)                           | 16.4024(10)                          | 14.4045(9)                                        | 14.7676(8)                                        | 18.6493(13)                                            | 18.223(5)                                         |
| <b>α (deg)</b>                             | 100.5596(4)                          | 92.8970(10)                          | 90                                                | 90                                                | 90                                                     | 90                                                |
| <b>β (deg)</b>                             | 96.2248(5)                           | 93.1560(10)                          | 96.753(5)                                         | 100.540(5)                                        | 108.776(7)                                             | 93.342(5)                                         |
| <b>γ (deg)</b>                             | 85.6998(3)                           | 110.3720(10)                         | 90                                                | 90                                                | 90                                                     | 90                                                |
| <b>V (Å<sup>3</sup>)</b>                   | 1245.69(5)                           | 1156.88(13)                          | 2914.3(3)                                         | 2764.6(2)                                         | 2938.4(3)                                              | 1331.4(12)                                        |
| <b>D<sub>calc</sub> (g/cm<sup>3</sup>)</b> | 1.180                                | 1.271                                | 1.585                                             | 1.531                                             | 1.768                                                  | 1.508                                             |
| <b>μ (mm<sup>-1</sup>)</b>                 | -                                    | 0.074                                | 0.810                                             | 0.781                                             | 1.386                                                  | 3.069                                             |
| <b>Measd reflns</b>                        | -                                    | 18826                                | 7545                                              | 6336                                              | 7363                                                   | 5040                                              |
| <b>Indep reflns</b>                        | -                                    | 6729                                 | 3379                                              | 3140                                              | 3375                                                   | 2348                                              |
| <b>R<sub>1</sub>(obs)</b>                  | -                                    | 0.0555                               | 0.083                                             | 0.0602                                            | 0.0786                                                 | 0.0740                                            |
| <b>wR<sub>2</sub> (all data)</b>           | -                                    | 0.1639                               | 0.204                                             | 0.222                                             | 0.1626                                                 | 0.1003                                            |
| <b>R<sub>wp</sub></b>                      | 8.2                                  | -                                    | -                                                 | -                                                 | -                                                      | -                                                 |
| <b>R<sub>exp</sub></b>                     | 2.1                                  | -                                    | -                                                 | -                                                 | -                                                      | -                                                 |

## Gel Phase Crystallization

LMWGs have been successfully used as media for crystal growth. The intrinsic supramolecular nature of such systems is potentially useful since their formation/disruption displays reversibility upon the application of a suitable stimulus, which can be used for the easy recovery of the gel-grown crystals. In order to test the photoreactivity of anthracene in a gel of bis(urea) gelator G1, both anthracene and the gelator were dissolved in toluene, and, after heating, the gel was obtained. After an overnight irradiation of the gel at  $\lambda = 365$  nm crystals were obtained, which were recovered after gel decomposition with an ethanolic solution of tetrabutylammonium acetate, and subsequently tested by X-ray single crystal diffraction (see Fig. S5). The unit cell of the crystals corresponded to the unit cell of the anthracene dimer reported in the CSD. A comparison between crystals of the dianthracene obtained via solution irradiation and those obtained from gel showed that crystals grown in the gel medium are much larger with respect to those grown in solution (Fig. S6).

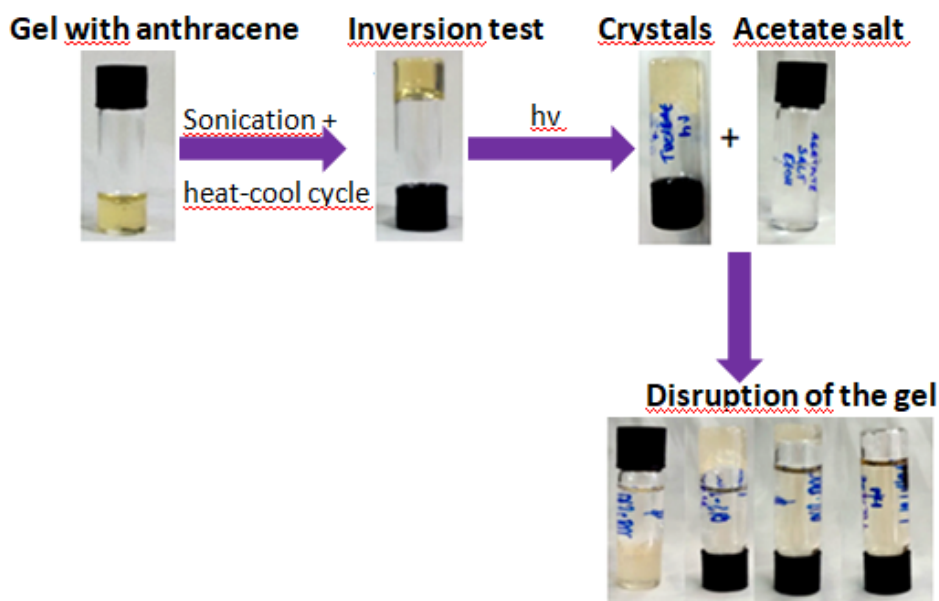

**Fig. S5a** Irradiation of anthracene in gel medium and subsequent gel disruption using an ethanolic solution of tetrabutylammonium acetate.

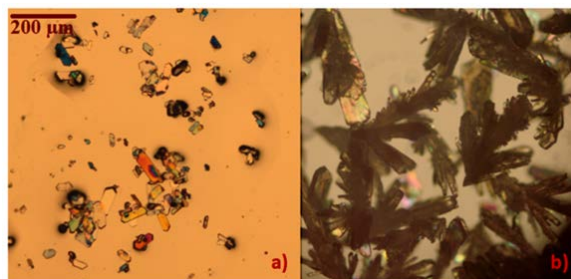

**Fig. S5b** Pictures of the crystals of dianthracene obtained after irradiation in solution (left) and in the gel medium (right), taken by optical microscope.

## <sup>1</sup>H NMR spectroscopy

Solution <sup>1</sup>H NMR spectroscopy was also employed to follow the cyclization reaction in the gel for both anthracene and MAMA. Figure S6a shows how the intensity of the aromatic CH signals decreases upon increasing the irradiation time, while signals corresponding to the tertiary bridgehead aliphatic CH protons start to appear (however they immediately disappear again due to precipitation of the anthracene dimer, which is insoluble in the gel). In the case of MAMA (see Fig. S6b), which is only slightly soluble in toluene, no crystal formation was observed, although the NMR spectra show - as in the case of anthracene - a decrease in the intensity of the aromatic CH signals and, after a much longer time, the appearance of resonances assigned to bridgehead aliphatic CH protons. Interaction of MAMA with gel fibres, together with its low concentration, might be the reason why formation of the photocyclization product could only be detected after a long time, and no crystal growth could be observed.

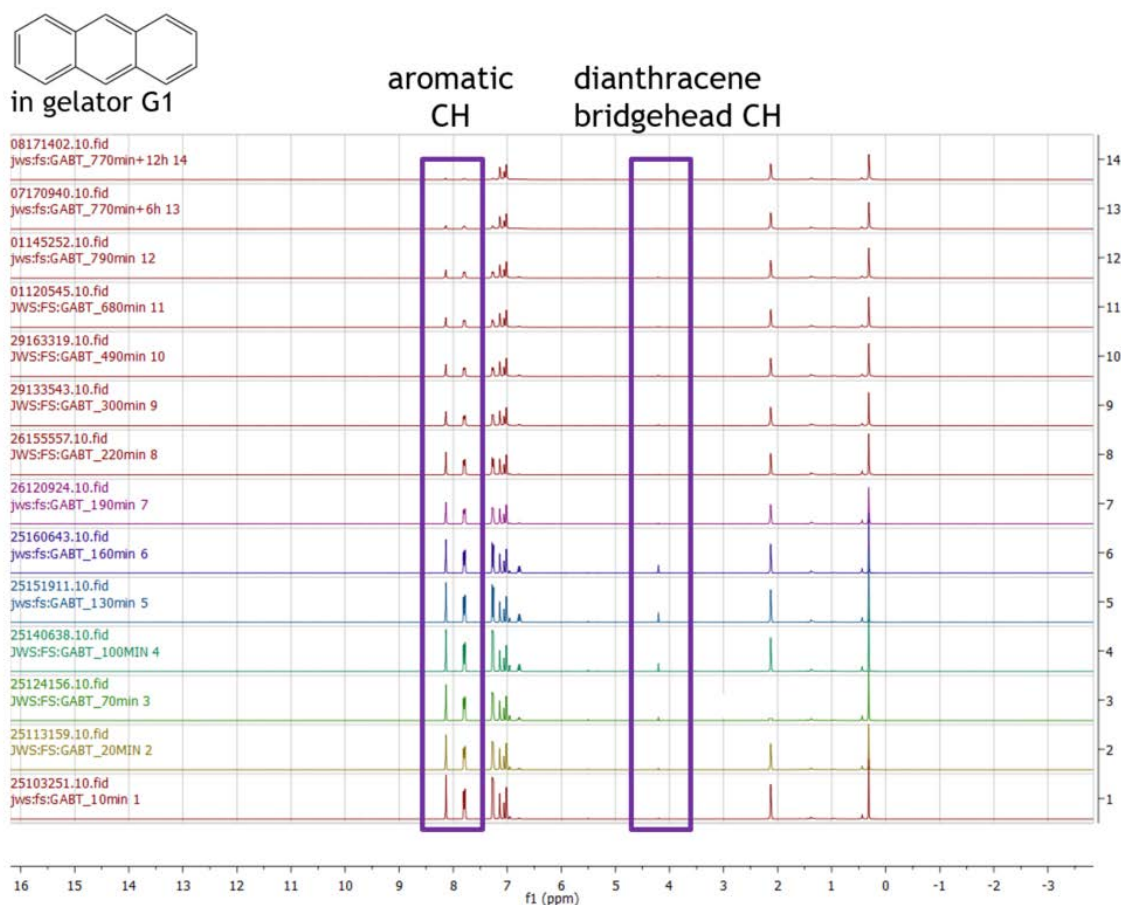

**Fig. S6a** Solution  $^1\text{H}$  NMR spectra of anthracene in gel: the intensity of the aromatic CH signals decreases upon increasing the irradiation time, while signals corresponding to the tertiary bridgehead aliphatic CH start to appear after a few minutes (however they immediately disappear again due to precipitation of the anthracene dimer, which is insoluble in the gel).

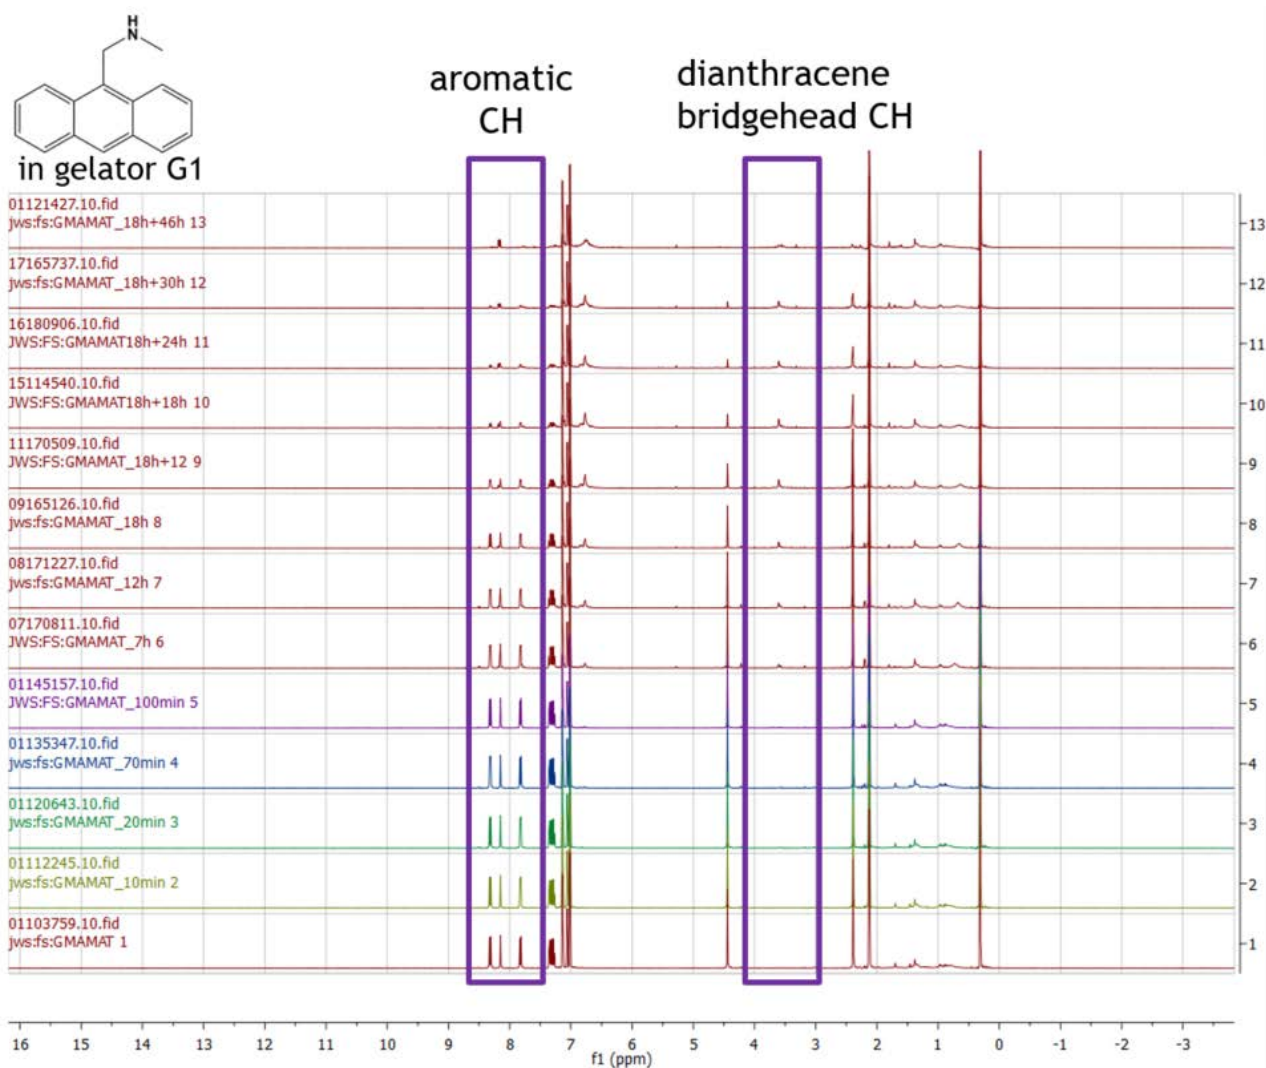

**Fig. S6b** Solution  $^1\text{H}$  NMR spectra of MAMA in gel: the intensity of the aromatic CH signals decreases upon increasing the irradiation time, while signals corresponding to the tertiary bridgehead aliphatic CH start to appear only after many hours.

### Synthesis of the gelator G1

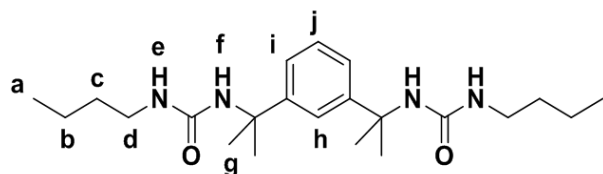

To a stirred solution of *n*-butylamine (0.1 cm<sup>3</sup>, 1.01 mmol) in chloroform (20 cm<sup>3</sup>) at 20 °C was added 1,3-bis(1-isocyanato-1-methylethyl)benzene (0.1 cm<sup>3</sup>, 0.43 mmol). The reaction mixture was left to stand under air for 24 hours at 20 °C then concentrated *in vacuo* and filtered under suction. The collected solids were washed with chloroform (2 x 20 cm<sup>3</sup>) and dried in a drying pistol. Compound **1** was obtained as a white solid (152 mg, 0.39 mmol, 90%), *m/z* (ESI-MS) 413.8 [M+Na]<sup>+</sup>. <sup>1</sup>H NMR (400 MHz, DMSO-*d*<sub>6</sub>) δ 7.33 (t, *J* = 1.8 Hz, 1H, *h*), 7.20 – 7.08 (m, 3H, *i, j*), 6.12 (s, 2H, *f*), 5.75 (t, *J* = 5.7 Hz, 2H, *e*), 2.92 (dt, *J* = 6.3, 5.7 Hz, 4H, *d*), 1.51 (s, 12H, *g*), 1.38 – 1.18 (m, 8H, *b, c*), 0.95 – 0.73 (m, 6H, *a*). <sup>13</sup>C NMR (101 MHz, DMSO-*d*<sub>6</sub>) δ 157.59, 148.97, 127.68, 122.75, 121.75, 54.65, 38.96, 32.71, 30.63, 19.99, 14.17. Anal. Calc. (%) (C<sub>22</sub>H<sub>38</sub>N<sub>4</sub>O<sub>2</sub>) C 67.66, H 9.81, N 14.35; Found (%) C 67.40, H 9.72, N 14.27.

## Raman spectroscopy

**Table S2** Main Raman band wavenumbers and assignments for MAMA and DMAMA. The band wavenumbers of dianthracene are reported for comparison. The bands characteristic of fused benzene rings are highlighted in bold. The bands characteristic of the dimer are indicated in red.

| Assignments                                                                                                                                    | MAMA            | DMAMA              | Dianthracene <sup>1</sup> | Assignments                                                                                 |
|------------------------------------------------------------------------------------------------------------------------------------------------|-----------------|--------------------|---------------------------|---------------------------------------------------------------------------------------------|
| CC ring stretching in anthracene <sup>2,3</sup> , in alkyl-substituted anthracenes <sup>4</sup> , and 9-substituted derivatives <sup>5,6</sup> | 1625 vw         |                    |                           |                                                                                             |
|                                                                                                                                                |                 | <b>1597-1591 m</b> | 1603-1592                 | Phenyl CC stretching in 9,10-dihydroanthracene <sup>7</sup> and ortho-xylene <sup>8,9</sup> |
| CC ring stretching in anthracene and 9-substituted derivatives <sup>2,3,5</sup>                                                                | 1575 sh         | 1576 sh            | 1582                      | Phenyl CC stretching in dianthracene <sup>1</sup> and 9,10-dihydroanthracene <sup>7</sup>   |
| CC ring stretching in anthracene and 9-substituted derivatives <sup>2,3,5,6</sup>                                                              | 1558 s          |                    |                           |                                                                                             |
| Aromatic CH in plane bending <sup>5</sup> and CC ring stretching <sup>6</sup> in anthracene <sup>10</sup> and                                  | 1503-<br>1493 w |                    |                           |                                                                                             |

|                                                                                                                                                                                       |                  |                |      |                                                                                                                   |
|---------------------------------------------------------------------------------------------------------------------------------------------------------------------------------------|------------------|----------------|------|-------------------------------------------------------------------------------------------------------------------|
| 9-substituted derivatives                                                                                                                                                             |                  |                |      |                                                                                                                   |
| CC ring stretching in anthracene and 9-substituted derivatives <sup>2,5</sup> , aromatic CH in plane bending in anthracene <sup>3,5</sup>                                             | 1477 m           | 1479 mw        | 1464 | Phenyl CC stretching in 9,10-dihydroanthracene <sup>7</sup>                                                       |
| CH <sub>3</sub> symmetric deformation <sup>8</sup>                                                                                                                                    | 1453 w           | 1453 w         |      |                                                                                                                   |
| CC ring stretching in anthracene <sup>2,3,5</sup> and 9-substituted anthracene <sup>8,11</sup><br><b>characteristic of fused benzene rings<sup>12</sup></b>                           | <b>1408 vs</b>   | 1410 w         |      |                                                                                                                   |
| Aromatic CH in plane bending in anthracene <sup>3,5</sup> CC ring stretching in 9-substituted anthracene <sup>6,8,11</sup> , CH <sub>3</sub> antisymmetric deformation <sup>6,8</sup> | 1381 m           |                |      |                                                                                                                   |
| Aromatic CH in plane bending in anthracene and 9-substituted anthracene <sup>5</sup>                                                                                                  | 1356 ms          |                |      |                                                                                                                   |
|                                                                                                                                                                                       |                  | 1348 vw        | 1338 | Tertiary CH deformation <sup>8</sup>                                                                              |
| Aromatic CH in plane bending in anthracene <sup>3,5</sup>                                                                                                                             | 1278 m           | 1271 vw        | 1265 | CH in plane bending in 9,10-dihydroanthracene <sup>7</sup>                                                        |
| CC ring stretching <sup>2,3</sup> and aromatic CH in plane bending <sup>5</sup> in anthracene                                                                                         | 1258 m           | 1261 sh        | 1263 | CH out of phase bending in 9,10-dihydroanthracene <sup>7</sup>                                                    |
|                                                                                                                                                                                       |                  | <b>1211 vs</b> | 1228 | CC symmetric stretching in 9,10-dihydroanthracene <sup>7</sup> , ortho-dialkylbenzenes <sup>8,9</sup>             |
|                                                                                                                                                                                       |                  | 1194 sh br     | 1187 | CC antisymmetric stretching in 9,10-dihydroanthracene <sup>7</sup> , internal quaternary carbon atom <sup>8</sup> |
| CH in plane bending in anthracene <sup>2,3,5</sup>                                                                                                                                    | 1181 m           |                | 1178 |                                                                                                                   |
|                                                                                                                                                                                       |                  | 1167 mw        | 1158 | Internal tertiary carbon atom <sup>8</sup>                                                                        |
| CH in plane bending in anthracene and 9-substituted anthracene <sup>3,5,6</sup> , aliphatic CH bending <sup>6,8</sup>                                                                 | 1155-<br>1142 vw | 1153-1141 vw   |      |                                                                                                                   |
| Aromatic CH in plane bending <sup>5</sup> and CC ring                                                                                                                                 | 1101 vw          |                |      |                                                                                                                   |



|                                                                                                                                                                |         |            |         |                                                                                                                                                                                                                                   |
|----------------------------------------------------------------------------------------------------------------------------------------------------------------|---------|------------|---------|-----------------------------------------------------------------------------------------------------------------------------------------------------------------------------------------------------------------------------------|
| stretching <sup>3</sup> in anthracene and 9-substituted anthracene                                                                                             |         |            |         |                                                                                                                                                                                                                                   |
|                                                                                                                                                                |         | 1085 w     |         | CH bending out of phase in 9,10-dihydroanthracene <sup>7</sup> , aliphatic CC stretching <sup>13</sup>                                                                                                                            |
|                                                                                                                                                                | 1043 vw | 1042 vs    | 1038    | CH bending in plane in 9,10-dihydroanthracene <sup>7</sup> , phenyl ring stretching + deformation in 9,10-dihydroanthracene <sup>14</sup> , ortho-disubstituted benzene <sup>8</sup> , internal tertiary carbon atom <sup>8</sup> |
| Aromatic CH in plane bending in anthracene <sup>5</sup>                                                                                                        | 1020 m  | 1016 mw    | 1024    | Phenyl ring breathing in 9,10-dihydroanthracene <sup>14</sup>                                                                                                                                                                     |
| Aromatic CH out of plane bending in anthracene <sup>2</sup> , CC ring stretching + aliphatic CH out of plane wagging in 9-substituted anthracene <sup>15</sup> | 985 vw  | 989 mw     | 996     | CH out of plane bending in 9,10-dihydroanthracene <sup>7</sup>                                                                                                                                                                    |
| Aromatic CH out of plane bending in anthracene and 9-substituted anthracene <sup>3,5,6</sup>                                                                   | 972 sh  |            |         |                                                                                                                                                                                                                                   |
| Aromatic CH out of plane bending <sup>3,5</sup> in anthracene and ring in plane bending <sup>5</sup> in 9-substituted anthracene                               | 957 sh  |            |         |                                                                                                                                                                                                                                   |
| Aromatic CH out of plane bending in anthracene <sup>5</sup> , CH <sub>3</sub> bending <sup>6</sup>                                                             | 949 w   | 951-938 vw | 950     | CH out of plane bending in 9,10-dihydroanthracene <sup>7</sup>                                                                                                                                                                    |
| Ring in plane bending <sup>5,6</sup> and aromatic CH out of plane bending <sup>3,6</sup> in 9-substituted anthracene                                           | 904 vw  |            |         |                                                                                                                                                                                                                                   |
|                                                                                                                                                                |         | 898-888 m  | 890-885 | Aliphatic CC stretching in dimers of anthracene derivatives, <sup>16</sup> skeletal bending in 9,10-dihydroanthracene <sup>7</sup>                                                                                                |
| Aromatic CH out of plane bending <sup>5,6</sup> of the group approximately perpendicular to the longer axis of the                                             | 879 w   |            |         |                                                                                                                                                                                                                                   |

|                                                                                                                                                                         |          |           |     |                                                                                                              |
|-------------------------------------------------------------------------------------------------------------------------------------------------------------------------|----------|-----------|-----|--------------------------------------------------------------------------------------------------------------|
| anthracene molecule (i.e. at the 10 position) <sup>17</sup>                                                                                                             |          |           |     |                                                                                                              |
| Aromatic CH out of plane bending in anthracene and 9-substituted anthracene <sup>5,6</sup>                                                                              | 866 w    | 869 vw    |     | CH out of plane bending in 9,10-dihydroanthracene <sup>7</sup>                                               |
| Aromatic CH out of plane bending in anthracene <sup>5</sup> , CH <sub>3</sub> bending <sup>6</sup>                                                                      | 848 w    | 854 vw    | 851 | CH out of plane bending in 9,10-dihydroanthracene <sup>7</sup>                                               |
| Ring in plane bending in anthracene <sup>5</sup> and aromatic CH out of plane bending in 9-substituted anthracene <sup>6</sup> , CH <sub>2</sub> bending <sup>6,8</sup> | 834 w    | 832 w, sh |     |                                                                                                              |
| Ring in plane bending in anthracene <sup>5</sup>                                                                                                                        | 818 w    | 816 mw    | 820 | Aliphatic CH out of plane bending in dianthracene <sup>17</sup>                                              |
| aromatic CH out of plane bending <sup>3</sup> of the groups approximately parallel to the longer axis of the anthracene molecule (i.e. no 10 position) <sup>17</sup>    | 750 w    | 750 mw    | 760 | CH out of plane bending in 9,10-dihydroanthracene <sup>7</sup> and ortho-disubstituted benzene <sup>17</sup> |
| aromatic CH out of plane bending in anthracene <sup>5,17</sup> ; ring out of plane bending in 9-substituted anthracene <sup>5,15</sup>                                  | 733 w br |           |     |                                                                                                              |
| Ring in plane bending in anthracene <sup>2</sup>                                                                                                                        | 703 m    | 701 m     | 711 |                                                                                                              |
| Ring in plane bending in anthracene and 9-substituted anthracene <sup>5,6</sup>                                                                                         | 693 m    |           |     |                                                                                                              |
|                                                                                                                                                                         |          | 685 m     |     | Ring torsion in anthrone <sup>13</sup>                                                                       |
| Ring in plane bending in anthracene <sup>2,5</sup>                                                                                                                      | 637 vw   | 636-627 w | 637 |                                                                                                              |
| Ring out of plane bending <sup>3</sup> and ring torsion <sup>5</sup> in anthracene                                                                                      | 576 vw   | 571 w     | 584 | Ring in plane bending in ortho-xylene <sup>8,18</sup>                                                        |
| Ring in plane bending in 9-substituted anthracene <sup>6</sup>                                                                                                          | 548 w    | 555 w     | 555 |                                                                                                              |
| Ring in plane bending in anthracene <sup>2</sup>                                                                                                                        | 535 vw   | 528 w     |     | Skeletal bending in 9,10-dihydroanthracene <sup>7</sup>                                                      |
| Ring in plane bending in                                                                                                                                                | 520 w    | 513 w     | 516 | Phenyl out of phase bending in                                                                               |

|                                                                                                                                                                       |               |        |     |                                                                                                                   |
|-----------------------------------------------------------------------------------------------------------------------------------------------------------------------|---------------|--------|-----|-------------------------------------------------------------------------------------------------------------------|
| anthracene <sup>2,5</sup>                                                                                                                                             |               |        |     | 9,10-dihydroanthracene <sup>7</sup>                                                                               |
| Ring torsion <sup>5,6</sup> , ring out of plane bending <sup>3</sup> in anthracene and 9-substituted anthracene                                                       | 476 w         |        |     |                                                                                                                   |
|                                                                                                                                                                       |               | 445 w  |     | Ring deformation in ortho-xylene, <sup>18</sup> internal tertiary carbon atom <sup>8</sup>                        |
| Ring in plane bending in 9-methyl anthracene <sup>8,18</sup>                                                                                                          | 421 ms        |        |     |                                                                                                                   |
|                                                                                                                                                                       |               | 406 m  |     | Phenyl out of plane bending in 9,10-dihydroanthracene <sup>7</sup>                                                |
| Ring bending in plane <sup>2,5,6</sup> , ring torsion <sup>6</sup> , in 9-methyl anthracene <sup>8,18</sup> <b>characteristic of fused benzene rings<sup>12</sup></b> | <b>394 ms</b> |        |     |                                                                                                                   |
| Ring out of plane bending in anthracene <sup>2</sup>                                                                                                                  | 366 w         | 365 m  | 361 | Skeletal bending in 9,10-dihydroanthracene <sup>7</sup>                                                           |
| ring torsion in 9-substituted anthracene <sup>6</sup>                                                                                                                 | 334 w         | 332 sh |     |                                                                                                                   |
|                                                                                                                                                                       |               | 326 s  | 327 | CC deformation in dianthracene <sup>1</sup>                                                                       |
| Ring torsion <sup>5</sup> and ring out of plane bending <sup>3</sup> in anthracene                                                                                    | 237 w         | 242 w  |     | Ring out of phase flapping in 9,10-dihydroanthracene <sup>7</sup>                                                 |
| Ring out of plane bending in anthracene <sup>2</sup> , ring torsion in 9-substituted <sup>6</sup>                                                                     | 214 vw        |        |     |                                                                                                                   |
|                                                                                                                                                                       |               | 153 vs |     | Lattice modes in dianthracene <sup>1</sup> , central ring in plane bending in 9,10-dihydroanthracene <sup>7</sup> |
| Ring torsion in anthracene <sup>5</sup> , CC bending in plane in 9-methyl anthracene <sup>18</sup>                                                                    | 148 w         |        |     |                                                                                                                   |
|                                                                                                                                                                       |               | 137 vs | 141 | Lattice modes in dianthracene <sup>1</sup>                                                                        |
| Ring torsion in anthracene and 9-substituted anthracene <sup>5,6</sup>                                                                                                | 105 s         | 116 s  | 110 | Lattice modes in dianthracene <sup>1</sup>                                                                        |
|                                                                                                                                                                       | 74 vs         | 75 vs  | 71  | Lattice modes in dianthracene <sup>1</sup>                                                                        |

v = very; w = weak; m = medium; s = strong; br = broad; sh = shoulder

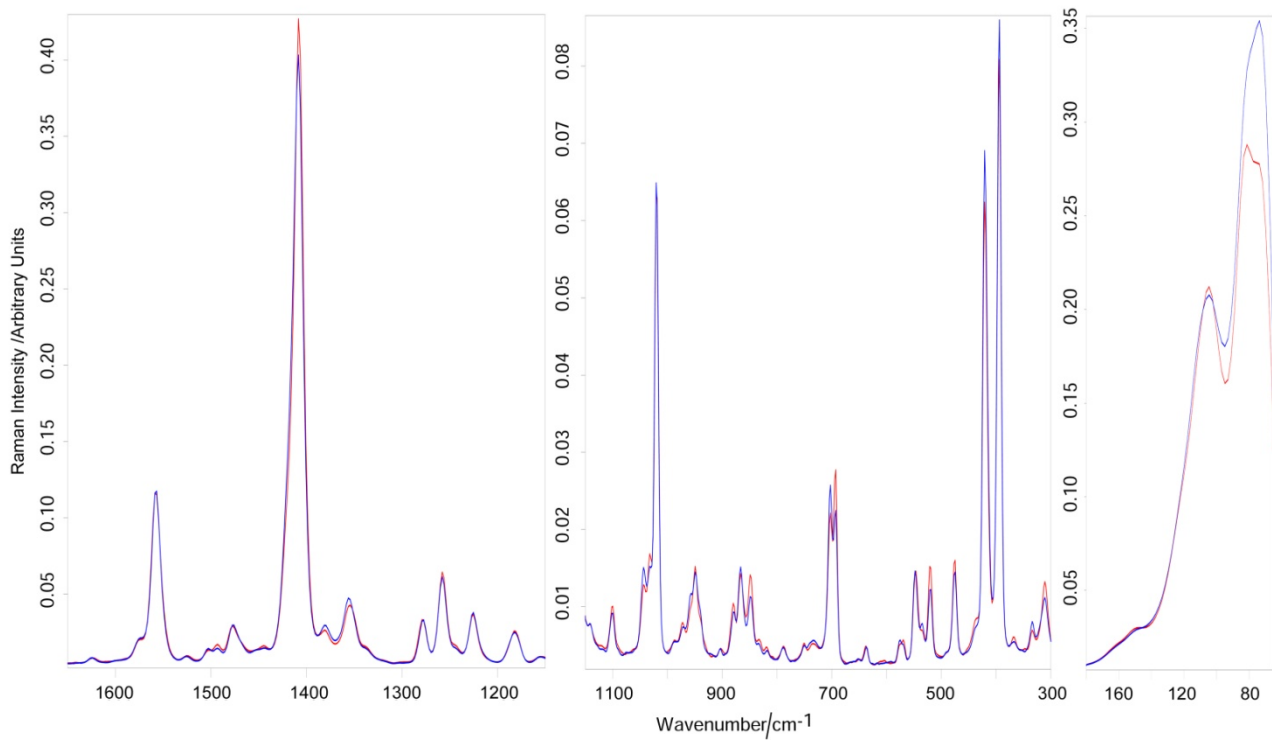

**Fig. S7** Raman spectra of MAMA before (blue) and after irradiation (red).

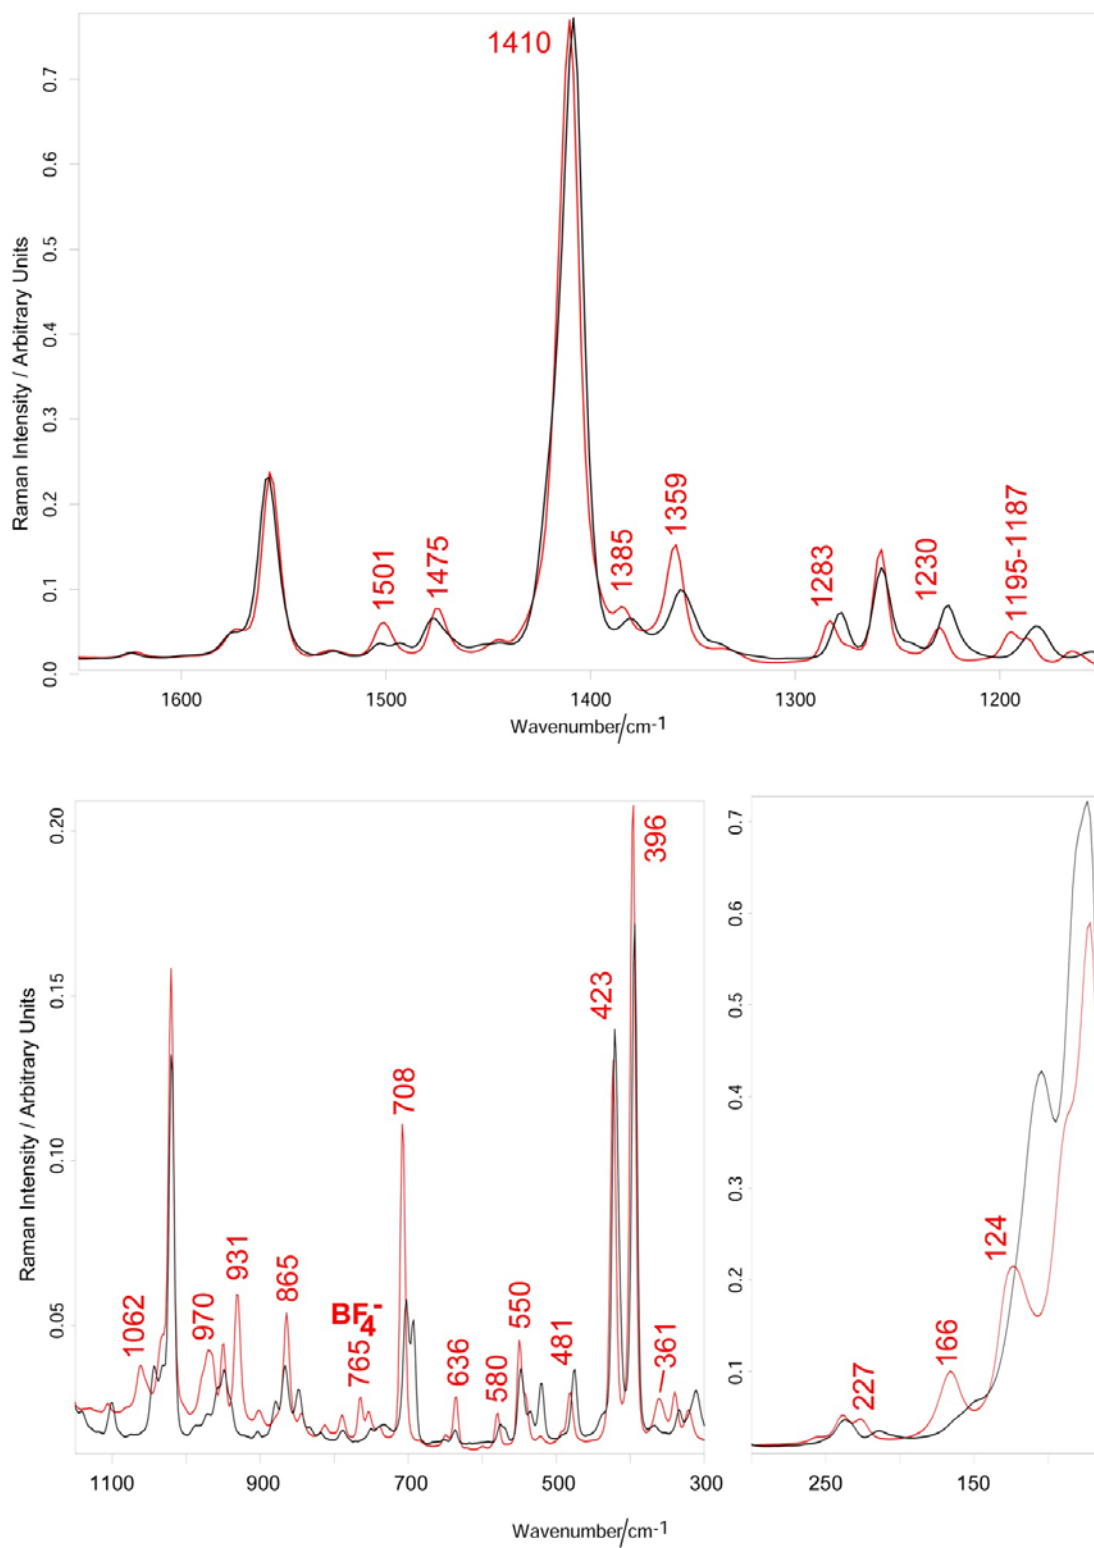

**Fig. S8** Raman spectra of MAMA (black) and  $[\text{Ag}(\text{MAMA})_2][\text{BF}_4]$  (red). The band assignable to the  $\text{BF}_4^-$  ion has been indicated ( $765 \text{ cm}^{-1}$ : FBF symmetric stretching).

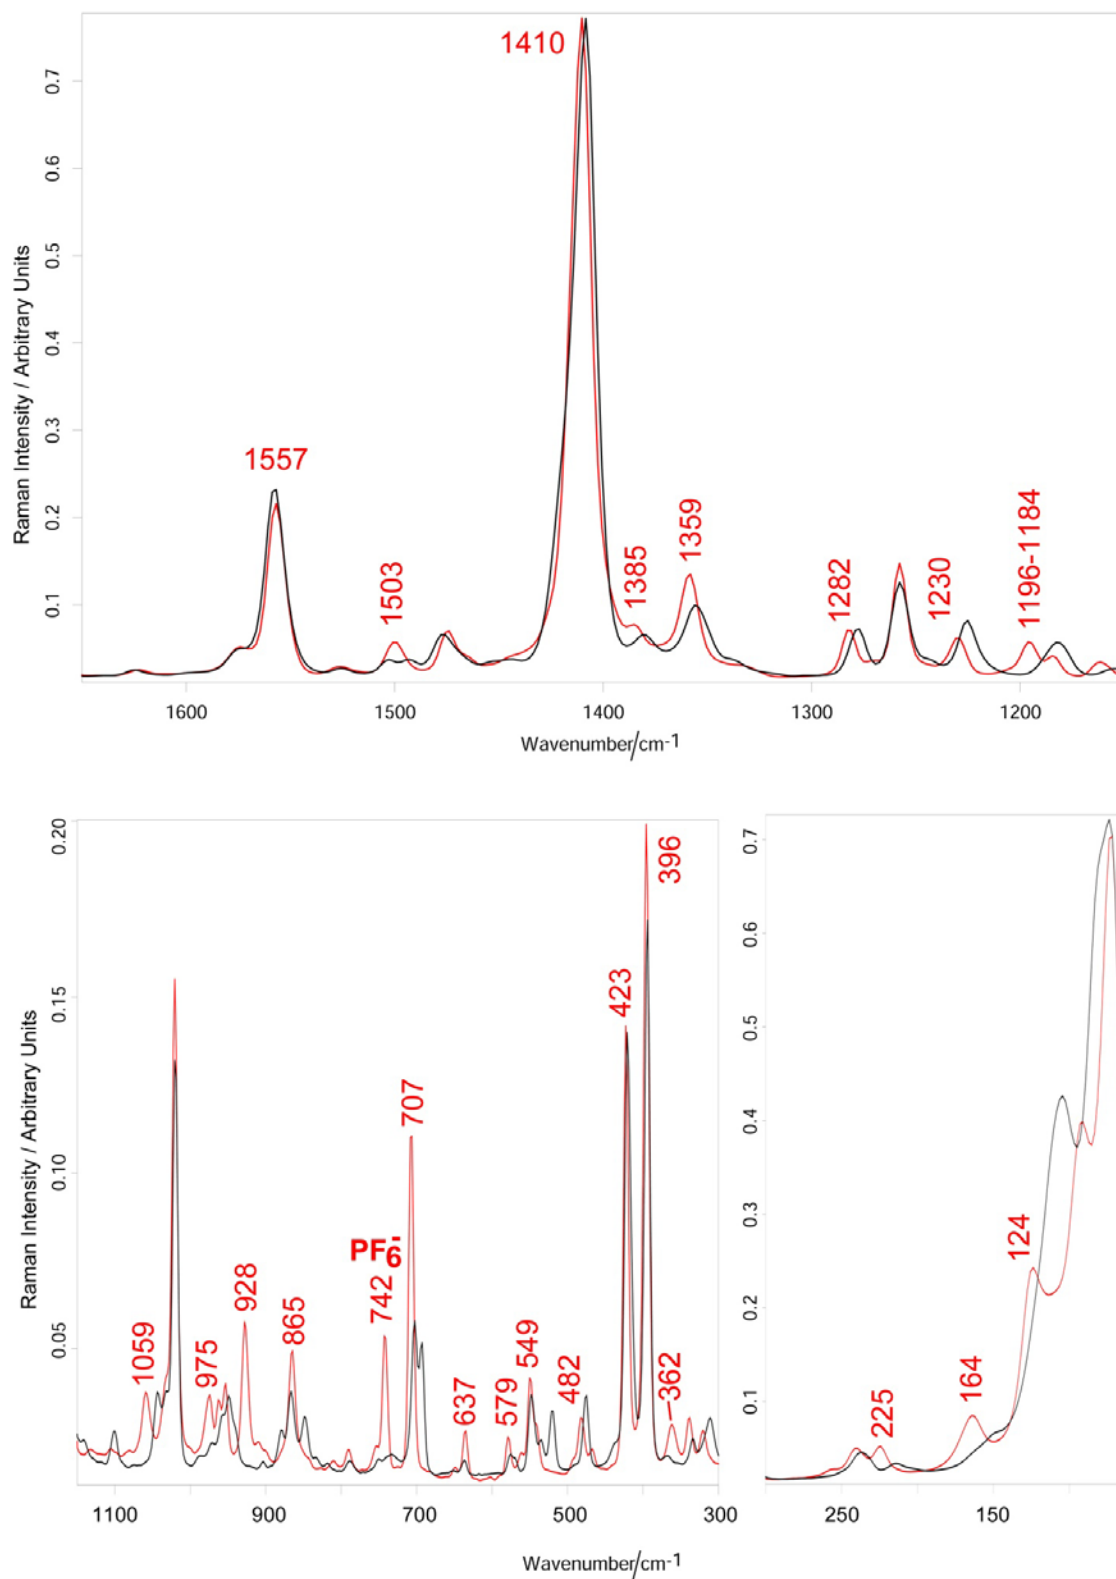

**Fig. S9** Raman spectra of MAMA (black) and [Ag(MAMA)<sub>2</sub>][PF<sub>6</sub>] (red). The band assignable to the PF<sub>6</sub><sup>-</sup> ion has been indicated (742 cm<sup>-1</sup>: FPF symmetric stretching).

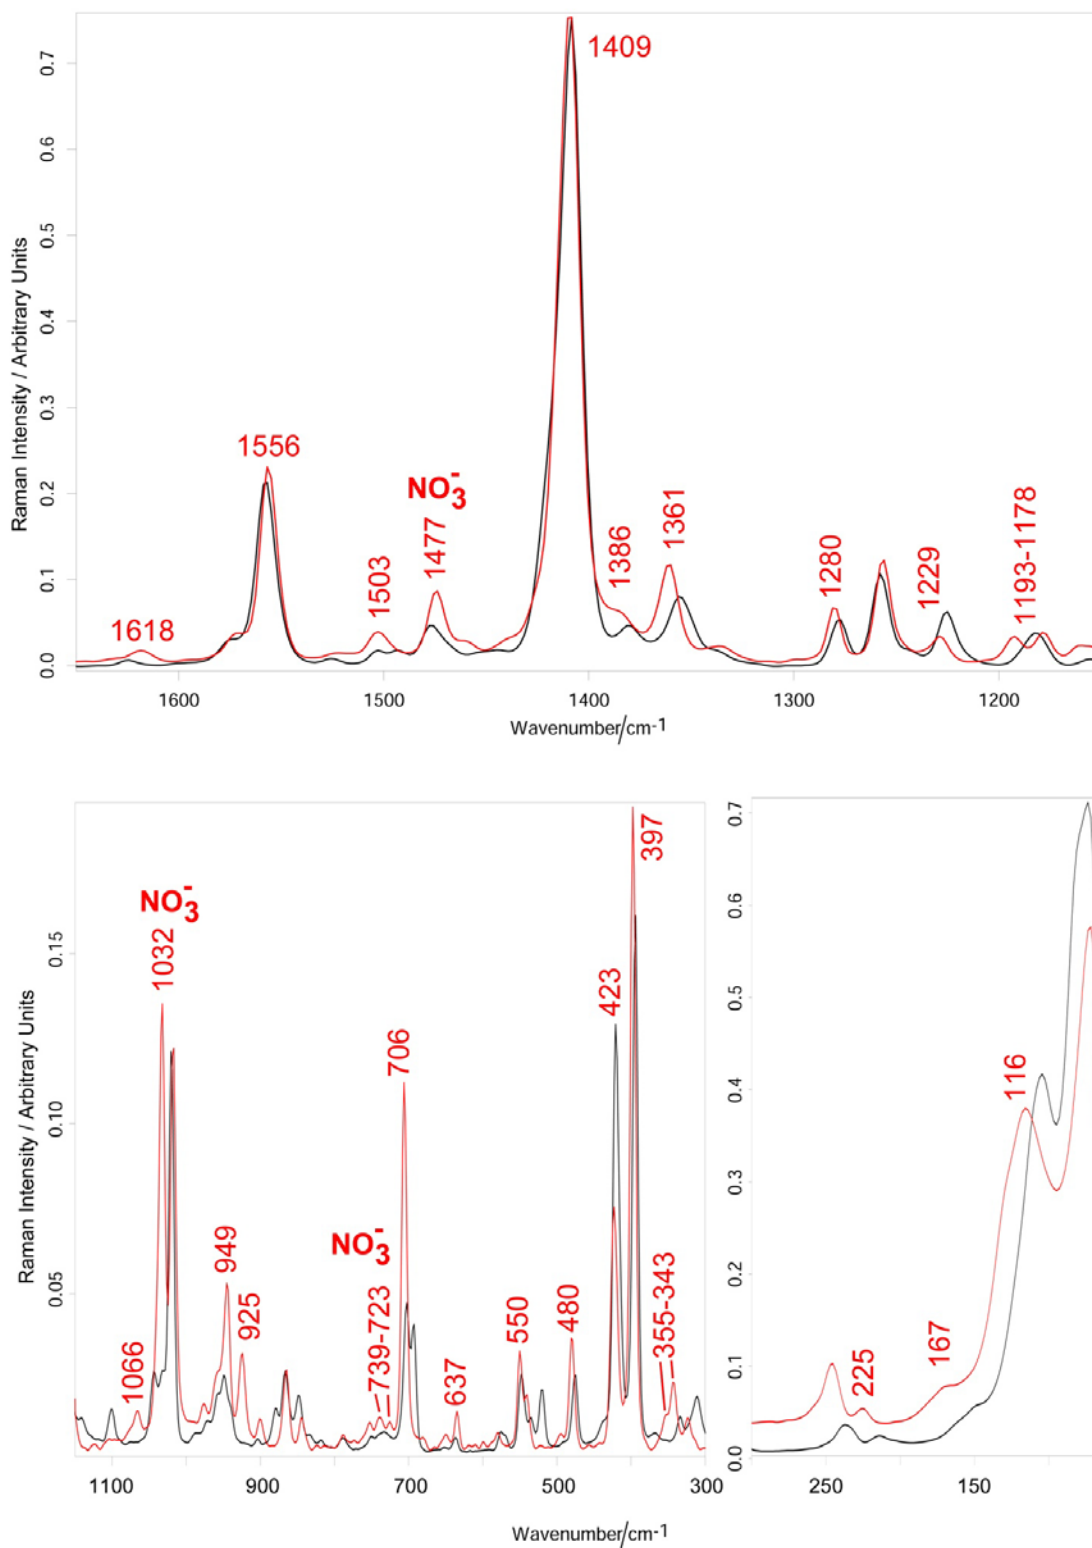

**Fig. S10** Raman spectra of MAMA (black) and [Ag(MAMA)<sub>2</sub>][NO<sub>3</sub>]. The bands assignable to the NO<sub>3</sub><sup>-</sup> ion have been indicated (1477 cm<sup>-1</sup>: N=O stretching in bidentate NO<sub>3</sub><sup>-</sup> coordination; 1032 cm<sup>-1</sup>: ONO symmetric stretching; 739-723 cm<sup>-1</sup>: in plane NO<sub>3</sub><sup>-</sup> deformation).

## References

1. Y. Ebisuzaki, T. J. Taylor, J. T. Woo and M. Nicol, *J. Chem. Soc., Faraday Trans*, 1977, **73**, 253-264.
2. N. Abasbegović, N. Vukotić and L. Colombo, *J. Chem. Phys.*, 1964, **41**, 2575-2577.
3. J. Räsänen, F. Stenman and E. Penttinen, *Spectrochim. Acta A*, 1973, **29**, 395-403.
4. L.H. Colthup and S.E. Daly, Wiberley. *Introduction to Infrared and Raman Spectroscopy*. 3<sup>rd</sup> Edition, Academic Press, San Diego, 1990.
5. A. Alparone, V. Librando, *Spectrochim. Acta A*, 2012, **89**, 129– 136.
6. Y. S. Mary, H. T. Varghese, C. Y. Panicker, T. Thiemann, A. A. Al-Saadi, S. A. Popoola, C. Van Alsenoy and Y. A. Jasem, *Spectrochim. Acta A*, 2015, **150**, 533–542.
7. K. Morris and J. Laane, *J. Mol. Struct.*, 1997, **413-414**, 13-20.
8. F. R. Dollish, W. G. Fateley and F. F. Bentley, *Characteristic Raman frequencies of organic compounds*. Wiley-Interscience, Chichester, 1974.
9. K. S. Pitzer and D. W. Scott., *J. Am. Chem. Soc.*, 1943, **65**, 803-829.
10. W. F. Maddams, I. A. M. Royaud, *Spectrochim. Acta A*, 1990, **46**, 309-314.
11. M. Brigodiot and J. M. Lebas, *Spectrochim. Acta A*, 1971, **27**, 1325-1336.
12. I. L. Tocón, J. C. Otero, J. F. Arenas, J. V. Garcia-Ramos and S. Sanchez-Cortes, *Anal. Chem.*, 2011, **83**, 2518–2525.
13. Y. S. Mary, T. S. Yamuna, C. Y. Panicker, H. S. Yathirajan, M. S. Siddegowda, A. A. Al-Saadi, C. Van Alsenoy and J. Ahmad, *Spectrochim. Acta A*, 2015, **135**, 652–661.
14. M. Brigodiot and J. M. Lebas, *J. Mol. Struct.*, 1976, **32**, 297-309.
15. S. Kou, H. Zhou, G. Tang, R. Li, Y. Zhang, J. Zhao and C.i Wei, *Spectrochim. Acta A*, 2012, **96**, 768–775.
16. L. Opilik, P. Payamyar, J. Szczerbinski, A. P. Schütz, M. Servalli, T. Hungerland, A. D. Schlüter and R. Zenobi, *ACS Nano*, 2015, **9**, 4252–4259.
17. S. Singh and C. Sandorfy, *Can. J. Chem.*, 1969, **47**, 257-263.
18. M. Brigodiot and J. M. Lebas, *Spectrochim. Acta A*, 1971, **27**, 1315-1324.
